# Supplementary material for: Cooking methods and kitchen ventilation availability, usage, perceived performance and potential in Canadian homes
Source: PubMed Central journal article supplement (PMC10234804; doi:10.1038/s41370-023-00543-z), 2023-04-15
Supplement: 41370_2023_543_MOESM1_ESM.pdf [file 41370_2023_543_MOESM1_ESM.pdf]

## **Supplemental Information**

### **Cooking Methods and Kitchen Ventilation Availability, Usage, Perceived Performance and Potential in Canadian Homes**

Liu Sun<sup>1</sup>, Brett C. Singer<sup>2</sup>

<sup>1</sup> Air Sectors Assessment and Exposure Science Division, Water and Air Quality Bureau, Health Canada, Ottawa, Ontario, Canada

<sup>2</sup> Indoor Environment Group, Sustainable Energy and Environmental Systems Department, Energy Technologies Area, Lawrence Berkeley National Laboratory, Berkeley, California, USA

Corresponding author: [liu.sun@hc-sc.gc.ca](mailto:liu.sun@hc-sc.gc.ca)

## Cooking and Kitchen Ventilation Survey Questionnaire

**1. Which category below includes your age?**

- a) 18-24
- b) 25-34
- c) 35-44
- d) 45-54
- e) 55-64
- f) 65 or older

**2. What is your gender?**

- a) Male
- b) Female
- c) Other (please specify) \_\_\_\_\_

**3. Which province do you currently live in?**

- a) Quebec
- b) Ontario
- c) Manitoba
- d) Saskatchewan
- e) Alberta
- f) British Columbia
- g) Nova Scotia
- h) Newfoundland and Labrador
- i) Prince Edward Island
- j) New Brunswick

**Section 1: Cooking and ventilation devices**

**4. What is the fuel type of your primary cooking stove and oven?**

|       | Electricity | Natural gas | Propane | Other, please specify |
|-------|-------------|-------------|---------|-----------------------|
| Stove |             |             |         |                       |
| Oven  |             |             |         |                       |

**5. Do you have any of the following ventilation devices above (or at) the cooking stove?**

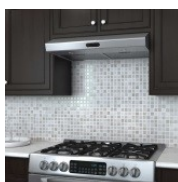

- a) Under-cabinet range hood

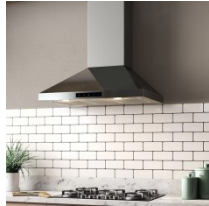

b) Wall-mounted range hood

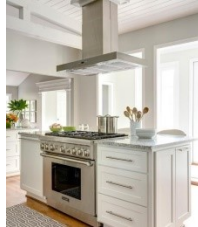

c) Ceiling-mounted range hood

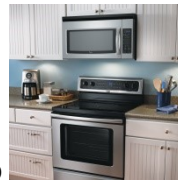

d) Over-the-Range microwave-hood combo

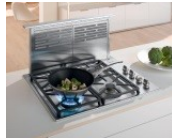

e) Downdraft exhaust

f) Other, please specify \_\_\_\_\_

g) I do not have a ventilation device above (or at) the stove [if yes, then only answer Q6, Q13-16, Q28-30, Q36-42]

**6. Other than the cooking area, does your kitchen have any additional ventilation devices?**

- a) Yes, please specify where it is located \_\_\_\_\_
- b) No

**7. How many speed settings does your ventilation device have?**

- a) Single-speed
- b) Two speeds
- c) More than two speeds
- d) Don't know [if yes, skip Q8]

**8. How noisy is your ventilation device on various fan speed settings?**

[If Q7=single-speed]

|              |            |       |      |           |
|--------------|------------|-------|------|-----------|
|              | Very quiet | Quiet | Loud | Very loud |
| Single-speed |            |       |      |           |

If [Q7=two speeds]

|           |            |       |      |           |
|-----------|------------|-------|------|-----------|
|           | Very quiet | Quiet | Loud | Very loud |
| Low speed |            |       |      |           |

|                              |            |       |      |           |
|------------------------------|------------|-------|------|-----------|
| High speed                   |            |       |      |           |
| If [Q7=more than two speeds] |            |       |      |           |
|                              | Very quiet | Quiet | Loud | Very loud |
| Lowest speed                 |            |       |      |           |
| Medium speeds                |            |       |      |           |
| Highest speed                |            |       |      |           |

**9. Is your ventilation device ducted to the outside?**

a) Ducted to the outside

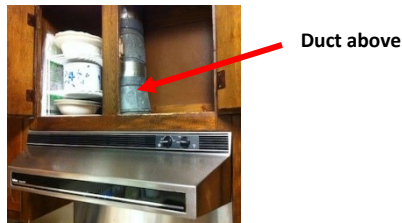

b) Not ducted to the outside, blowing air back into the kitchen

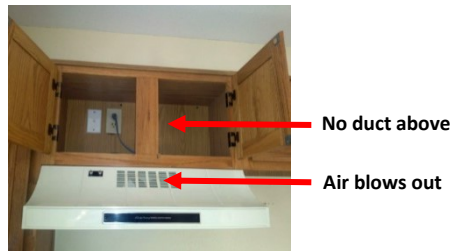

c) Don't know

**10. To what extent are the stove front burners covered by your ventilation device?**

- a) Fully
- b) More than half
- c) Less than half
- d) Mostly not

**11. How effective is your ventilation device in removing the following emissions from cooking?**

|          | None is removed | Some are removed | Most are removed | All are removed |
|----------|-----------------|------------------|------------------|-----------------|
| Smoke    |                 |                  |                  |                 |
| Odor     |                 |                  |                  |                 |
| Heat     |                 |                  |                  |                 |
| Moisture |                 |                  |                  |                 |

|        |  |  |  |  |
|--------|--|--|--|--|
| Grease |  |  |  |  |
|--------|--|--|--|--|

**12. Based on your experience, what aspects of your ventilation device, if any, need to be improved? Select all that apply.**

- a) Smoke removal
- b) Odor removal
- c) Heat removal
- d) Grease capture
- e) Noise
- f) More coverage of stove front burners
- g) Easier to clean grease screens
- h) Easier to purchase carbon filters
- i) Easier to change carbon filters
- j) Other (please specify) \_\_\_\_\_
- k) No improvement needed

**Section 2: Cooking behavior**

**13. How many days a week do you use the following cooking appliances?**

|                             | Every day (7 days) | 5-6 days | 3-4 days | 1-2 days | I typically do not use it |
|-----------------------------|--------------------|----------|----------|----------|---------------------------|
| Stovetop                    |                    |          |          |          |                           |
| Oven                        |                    |          |          |          |                           |
| Microwave                   |                    |          |          |          |                           |
| Toaster                     |                    |          |          |          |                           |
| Toaster oven                |                    |          |          |          |                           |
| Indoor grill                |                    |          |          |          |                           |
| Air fryer                   |                    |          |          |          |                           |
| Rice cooker                 |                    |          |          |          |                           |
| Slow cooker                 |                    |          |          |          |                           |
| Stand-alone pressure cooker |                    |          |          |          |                           |
| Stovetop pressure cooker    |                    |          |          |          |                           |

**14. For the following meals, what are your most frequent cooking styles? Select up to 3 options per meal.**

|           | Deep-frying | Stir-frying | Sautéing or pan-frying | Baking | Boiling or steaming | Grilling | Microwave | Toasting | Other, please specify | Do not cook for this meal |
|-----------|-------------|-------------|------------------------|--------|---------------------|----------|-----------|----------|-----------------------|---------------------------|
| Breakfast |             |             |                        |        |                     |          |           |          |                       |                           |

|        |  |  |  |  |  |  |  |  |  |  |
|--------|--|--|--|--|--|--|--|--|--|--|
| Lunch  |  |  |  |  |  |  |  |  |  |  |
| Dinner |  |  |  |  |  |  |  |  |  |  |

**15. Which stove burners do you use most often?**

- a) Front burners
- b) Back burners
- c) Use both equally

**16. In which season do you cook using a stove or oven the most?**

- a) Spring
- b) Summer
- c) Fall
- d) Winter
- e) Same in all seasons

**Section 3: Ventilation device use behavior**

**17. In general, how often do you use your ventilation device during cooking?**

- a) Always or most of the time
- b) Often
- c) Sometimes
- d) Rarely or never
- e) Don't know

**18. How often is your ventilation device turned on while:**

|                        | Always or most of the time | Often | Sometimes | Rarely or never | Don't know | Do not cook this way |
|------------------------|----------------------------|-------|-----------|-----------------|------------|----------------------|
| Deep-frying            |                            |       |           |                 |            |                      |
| Stir-frying            |                            |       |           |                 |            |                      |
| Sautéing or pan-frying |                            |       |           |                 |            |                      |
| Oven baking            |                            |       |           |                 |            |                      |
| Indoor grilling        |                            |       |           |                 |            |                      |
| Boiling or steaming    |                            |       |           |                 |            |                      |
| Using the toaster      |                            |       |           |                 |            |                      |
| Using the toaster oven |                            |       |           |                 |            |                      |
| Using the microwave    |                            |       |           |                 |            |                      |
| Oven self-cleaning     |                            |       |           |                 |            |                      |

**19. When you use your ventilation device, what are the main reasons? Select all that apply.**

- a) Remove smoke

- b) Remove odors
- c) Remove moisture
- d) Remove heat
- e) Capture grease
- f) Remove air pollutants emitted by cooking
- g) As a general ventilation method for the kitchen
- h) Never use it [skip Q20-22]
- i) Other, please specify \_\_\_\_\_

**20. When do you usually turn the ventilation device on while cooking? Check all that apply**

- a) When turning on any stove burner
- b) When starting to cook something that can produce smoke or odors
- c) Only when I sense strong smoke, odors, or heat
- d) Only when cooking causes uncomfortable air conditions

**21. When do you usually turn the ventilation device off while cooking?**

- a) When turning off the last burner
- b) When no longer needed to reduce smoke, odors, or heat
- c) Other, please specify \_\_\_\_\_

**22. When using the ventilation device, which fan speed do you use most often?**

[If Q7=two speeds]

- a) Low
- b) High
- c) Varies depending on what I am cooking

[If Q7= More than two speeds]

- a) Lowest
- b) Middle
- c) Highest
- d) Varies depending on what I am cooking

**23. If your ventilation device has metal grease screens, how often are they cleaned?**

- a) Every 1-2 months
- b) Every 3-6 months
- c) Every 7-12 months
- d) More than 1 year or longer
- e) Never
- f) no grease screens

**24. Do you have charcoal or carbon filters installed in your ventilation device?**

- a) Yes
- b) No [skip Q25-26]
- c) Don't know [skip Q25-26]

**25. How often do you replace charcoal or carbon filters?**

- a) Every 1-2 months
- b) Every 3-6 months
- c) Every 7-12 months
- d) More than 1 year or longer
- e) Haven't changed so far [please specify how many years the range hood has been used\_\_\_\_\_ [skip Q26]

**26. How do you decide to change the charcoal or carbon filters?**

- a) When the performance declines
- b) The filters have an indicator (e.g. changing colors or patterns)
- c) Other, please specify\_\_\_\_\_
- d) Not sure

**27. Other than using a range hood, do you clean the air of your home in other ways while cooking? Check all that apply.**

- a) Opening kitchen windows, when possible
- b) Opening windows of other rooms, when possible
- c) Running bathroom fans
- d) Running a central heating or cooling fan
- e) Running a portable air cleaner
- f) Other (please specify) \_\_\_\_\_
- g) No

**28. Cooking can generate unhealthy air pollutants from heating oil, fat, and other food ingredients, especially at high temperatures. Have you heard of this before?**

- a) Yes
- b) No

**29. Running a range hood not only reduces cooking odors or smoke but also reduces the air pollutants generated by cooking. Knowing this, will you use the range hood more often than you have in the past?**

- a) Yes [skip Q30]
- b) No
- c) Not sure
- d) I always use the range hood during cooking [skip Q30]



**30. Select the reason(s) for not using the range hood more often. Check all that apply.**

- a) Noisy
- b) Not effective
- c) Uses lots of energy
- d) I open windows instead
- e) I use an air cleaner instead
- f) Air pollutants emitted by cooking are not dangerous to my health
- g) Other (please specify) \_\_\_\_\_  
[Add the following three options only if Q5= does not own a range hood]
- h) Cost too much
- i) No space in the kitchen for a range hood
- j) Rental restrictions

**31. Cooking on BACK burners can increase the efficiency of a range hood because they are fully covered by the hood. Have you heard of this before?**

- a) Yes
- b) No

**32. Knowing that the range hood works better with the back burners, will you cook more often on the back burners (with a range hood running) than you have in the past?**

- a) Yes [skip Q33]
- b) No
- c) Not sure
- d) I already cook often on the backburners [skip Q33]

**33. Select the reason(s) for not using the back burners more often. Check all that apply.**

- a) Not convenient
- b) Burner size restrictions (e.g. only front burners provide the size that I use often).
- c) My range hood is not located above the range.
- d) Not necessary, my range hood covers all the stove burners
- e) I open windows instead
- f) I use an air cleaner instead
- g) Air pollutants emitted by cooking are not dangerous to my health
- h) Other, please specify \_\_\_\_\_

**34. Running a range hood at higher speeds can greatly reduce cooking-related pollutants. Knowing that, will you use a higher speed more often when frying, sautéing, or grilling?**

- a) Yes [skip Q35]
- b) No

- c) Not sure
- d) I always use a higher speed when frying, sautéing, or grilling [skip Q35]

**35. Select the reason(s) for not using a higher speed more often. Check all that apply.**

- a) It is the same at either speed of my range hood
- b) Too noisy at a higher speed
- c) Uses lots of energy
- a) I open windows instead
- b) I use an air cleaner instead
- c) Air pollutants emitted by cooking are not dangerous to my health
- d) Other, please specify \_\_\_\_\_

**Section 4: Dwelling information**

**36. Which category below describes your home?**

- a) Detached house
- b) Attached house (such as townhouse, row house, or semi-detached house)
- c) Apartment
- d) Mobile home
- e) Other, please specify \_\_\_\_\_
- f) Don't know

**37. Do you own your home?**

- a) Yes
- b) No (e.g. rented)

**38. In what year was your home built?**

- a) Before 1900
- b) 1900-1940
- c) 1941-1960
- d) 1961-1980
- e) 1981-2000
- f) After 2000
- g) Don't know

**39. What is the size of your home (excluding the basement)?**

- a) <1000 ft<sup>2</sup> (93 m<sup>2</sup>)
- b) 1001-2000 ft<sup>2</sup> (94-186 m<sup>2</sup>)
- c) 2001-3000 ft<sup>2</sup> (187-279 m<sup>2</sup>)
- d) >3000 ft<sup>2</sup> (280 m<sup>2</sup>)
- e) Don't know

**40. How is your kitchen connected to other parts of your home?**

- a) Part of the room that includes the dining or family room (open-concept kitchen)
- b) Separate room with open doorways connecting to other rooms
- c) Separate room with a door(s) that can be closed
- d) Other (please specify) \_\_\_\_\_
- e) Don't know

**41. How many people in each age category currently live in your home?**

|                                | 0 | 1 | 2 | 3 | 4 and above |
|--------------------------------|---|---|---|---|-------------|
| Young children (0-5 years old) |   |   |   |   |             |
| Children (6-14 years old)      |   |   |   |   |             |
| Youth (15-24 years old)        |   |   |   |   |             |
| Adults (25 – 64 years old)     |   |   |   |   |             |
| Seniors (65 years and over)    |   |   |   |   |             |

**42. Which category below describes your 2019 household income before taxes?**

- a) \$19,999 and under
- b) \$20,000 to \$39,999
- c) \$40,000 to \$59,999
- d) \$60,000 to \$99,999
- e) \$100,000 to \$149,999
- f) \$150,000 and over
- g) Prefer not to answer

**Table S1. Percentage distribution of responses regarding device use frequency by influential factors.**

| Influential factors                       | Group (N)                      | Device use frequency                            |           |           |                 |
|-------------------------------------------|--------------------------------|-------------------------------------------------|-----------|-----------|-----------------|
|                                           |                                | Adjusted population percentage (standard error) |           |           |                 |
|                                           |                                | Always or most of the time                      | Often     | Sometimes | Rarely or never |
| Ventilation type                          | Venting (2,433)                | 36 (1.1)                                        | 28 (1.1)  | 26 (1.0)  | 9.1 (0.6)       |
|                                           | Recirculating (1,035)          | 18 (1.4)                                        | 26 (1.6)  | 35 (1.7)  | 22 (1.5)        |
| Cooking method                            | Deep-frying (2,191)            | 53 (1.2)                                        | 15 (0.9)  | 17 (0.9)  | 15 (0.9)        |
|                                           | Stir-frying (3,285)            | 35 (1.0)                                        | 22 (0.8)  | 26 (0.9)  | 18 (0.8)        |
|                                           | Sautéing or pan-frying (3,590) | 33 (0.9)                                        | 22 (0.8)  | 28 (0.9)  | 17 (0.7)        |
|                                           | Indoor grilling (1,567)        | 28 (1.3)                                        | 18 (1.1)  | 23 (1.3)  | 31 (1.4)        |
|                                           | Boiling or steaming (3,544)    | 26 (0.9)                                        | 20 (0.8)  | 25 (0.8)  | 29 (0.9)        |
|                                           | Oven self-cleaning (2,518)     | 19 (0.9)                                        | 11 (0.7)  | 25 (1.0)  | 46 (1.1)        |
|                                           | Oven baking (3,534)            | 16 (0.7)                                        | 16 (0.7)  | 22 (0.8)  | 47 (1.0)        |
|                                           | Microwave (3,148)              | 7.7(0.5)                                        | 7.4 (0.5) | 8.5 (0.6) | 76 (0.9)        |
|                                           | Toaster oven (2,002)           | 6.9 (0.6)                                       | 8.3 (0.7) | 13 (0.9)  | 72 (1.1)        |
|                                           | Toaster (3,082)                | 6.7 (0.5)                                       | 7.1 (0.5) | 9.9 (0.6) | 76 (0.9)        |
| Speed setting                             | More than two speeds (973)     | 41 (1.8)                                        | 30 (1.7)  | 23 (1.5)  | 6.5 (0.9)       |
|                                           | Two speeds (2,267)             | 27 (1.1)                                        | 27 (1.1)  | 32 (1.1)  | 14 (0.8)        |
|                                           | Single speed (432)             | 18 (2.1)                                        | 27 (2.6)  | 33 (2.7)  | 22 (2.2)        |
| Single speed noise level                  | Very quiet (32)                | 44 (9.3)                                        | 21 (8.2)  | 24 (8.0)  | 10 (5.7)        |
|                                           | Quiet (111)                    | 16 (4.0)                                        | 44 (5.6)  | 27 (4.7)  | 13 (3.1)        |
|                                           | Loud (223)                     | 18 (2.9)                                        | 20 (3.2)  | 38 (3.9)  | 25 (3.3)        |
|                                           | Very loud (66)                 | 14 (4.4)                                        | 22 (6.9)  | 32 (7.1)  | 33 (6.7)        |
| Hood coverage for front burners           | Fully (761)                    | 42 (2.1)                                        | 27 (1.9)  | 23 (1.7)  | 7.6 (1.1)       |
|                                           | More than half (1,618)         | 30 (1.3)                                        | 30 (1.3)  | 28 (1.3)  | 11 (0.8)        |
|                                           | Less than half (1,040)         | 25 (1.6)                                        | 25 (1.6)  | 33 (1.7)  | 17 (1.3)        |
|                                           | Mostly not (398)               | 20 (2.3)                                        | 24 (2.6)  | 35 (2.8)  | 21 (2.4)        |
| User-perceived effectiveness <sup>†</sup> | High (1,180)                   | 40 (1.6)                                        | 30 (1.6)  | 24 (1.4)  | 6.6 (0.7)       |
|                                           | Medium (1,737)                 | 29 (1.3)                                        | 30 (1.3)  | 31 (1.3)  | 10 (0.8)        |
|                                           | Low (900)                      | 19 (1.5)                                        | 20 (1.6)  | 33 (1.8)  | 28 (1.7)        |

<sup>†</sup> device effectiveness was summarized based on the reported effectiveness in removing smoke, odor, moisture, and heat removal, as well as grease capture.

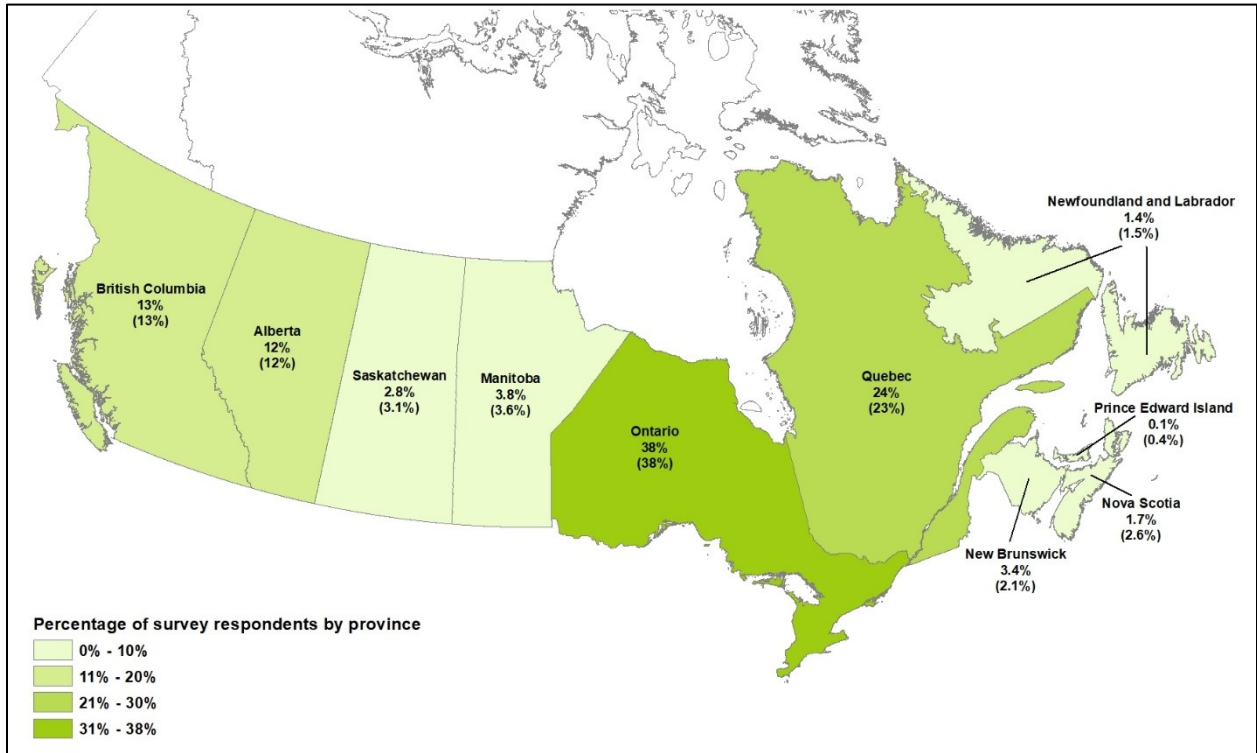

**Figure S1. Percentage of survey respondents (N=4,500) and the 2016 Canadian Census population (in brackets) by province.**

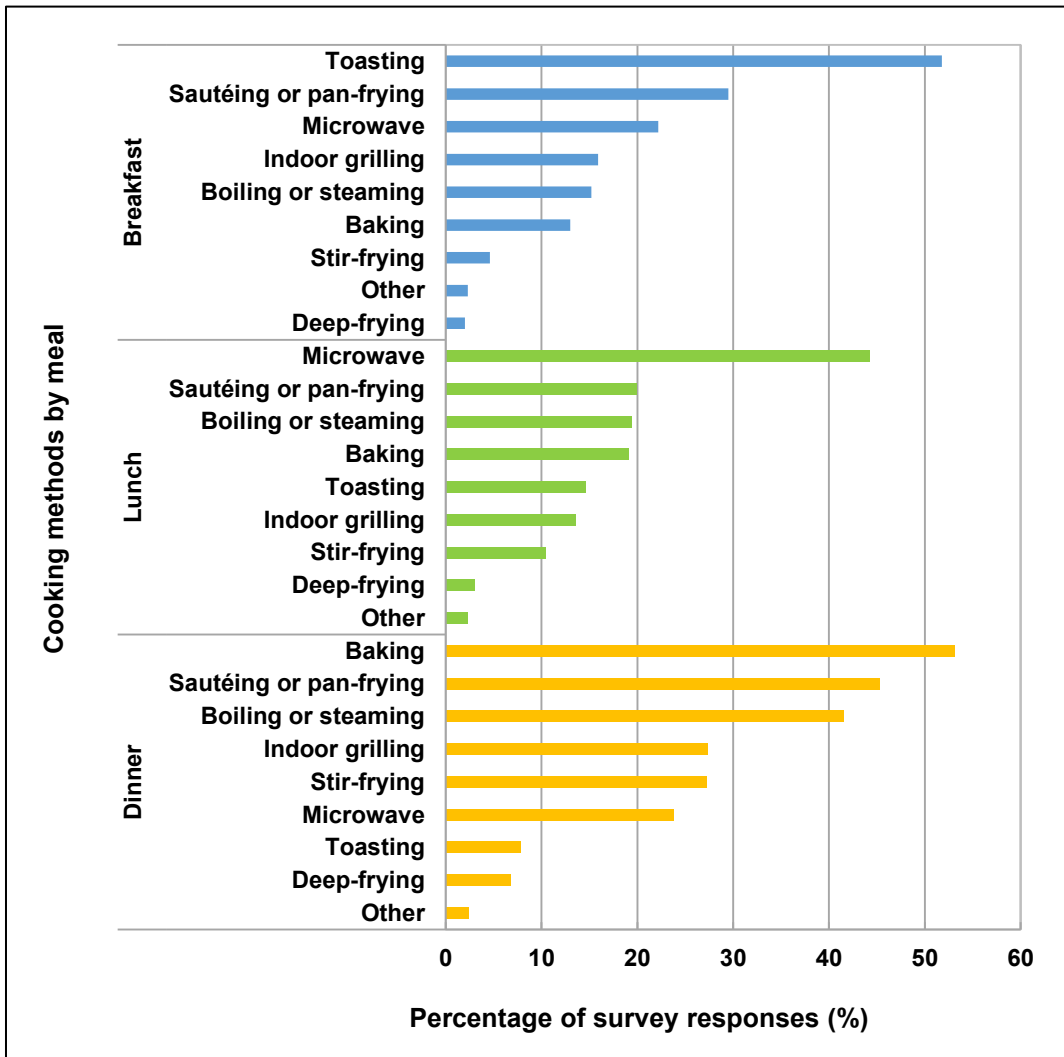

Figure S2. Most commonly used cooking methods for each meal among survey respondents (N=4,500).

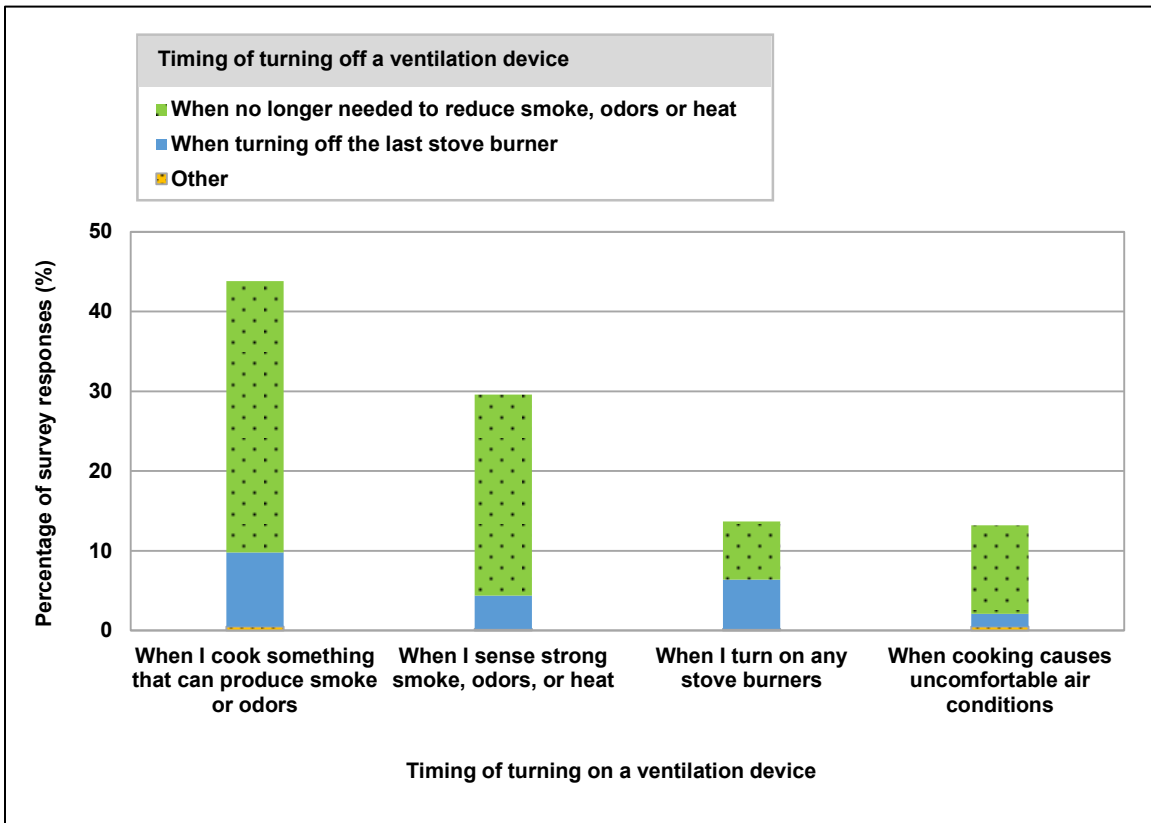

**Figure S3. Percentage distribution of survey responses (N=3,890) regarding the timing of turning on and off a ventilation device during cooking. Respondents (N=610) who reported not having a venting or recirculating ventilation device were excluded.**

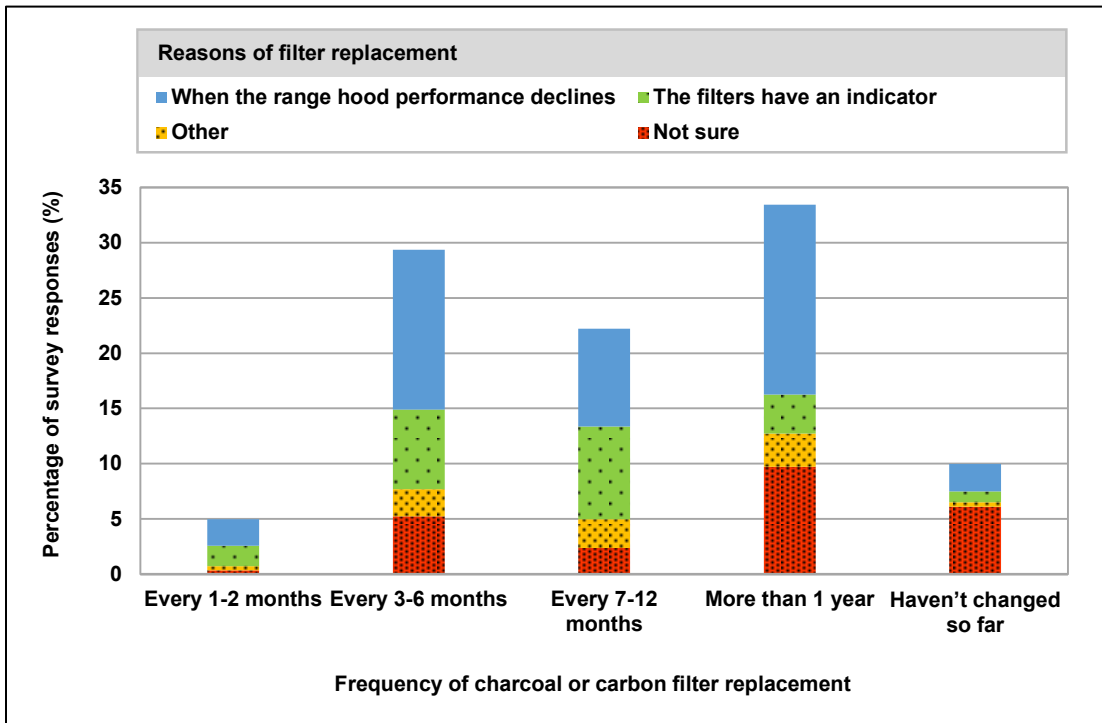

**Figure S4. Percentage distribution of survey responses (N=211) regarding charcoal or carbon filter replacement frequencies and reasons.**
